# Supplementary figures and images for: Predicting Mortality in Hospitalized COVID-19 Patients in Zambia: An Application of Machine Learning
Source: Hindawi journal article supplement (doi:10.1155/2023/8921220), 2023-05-22

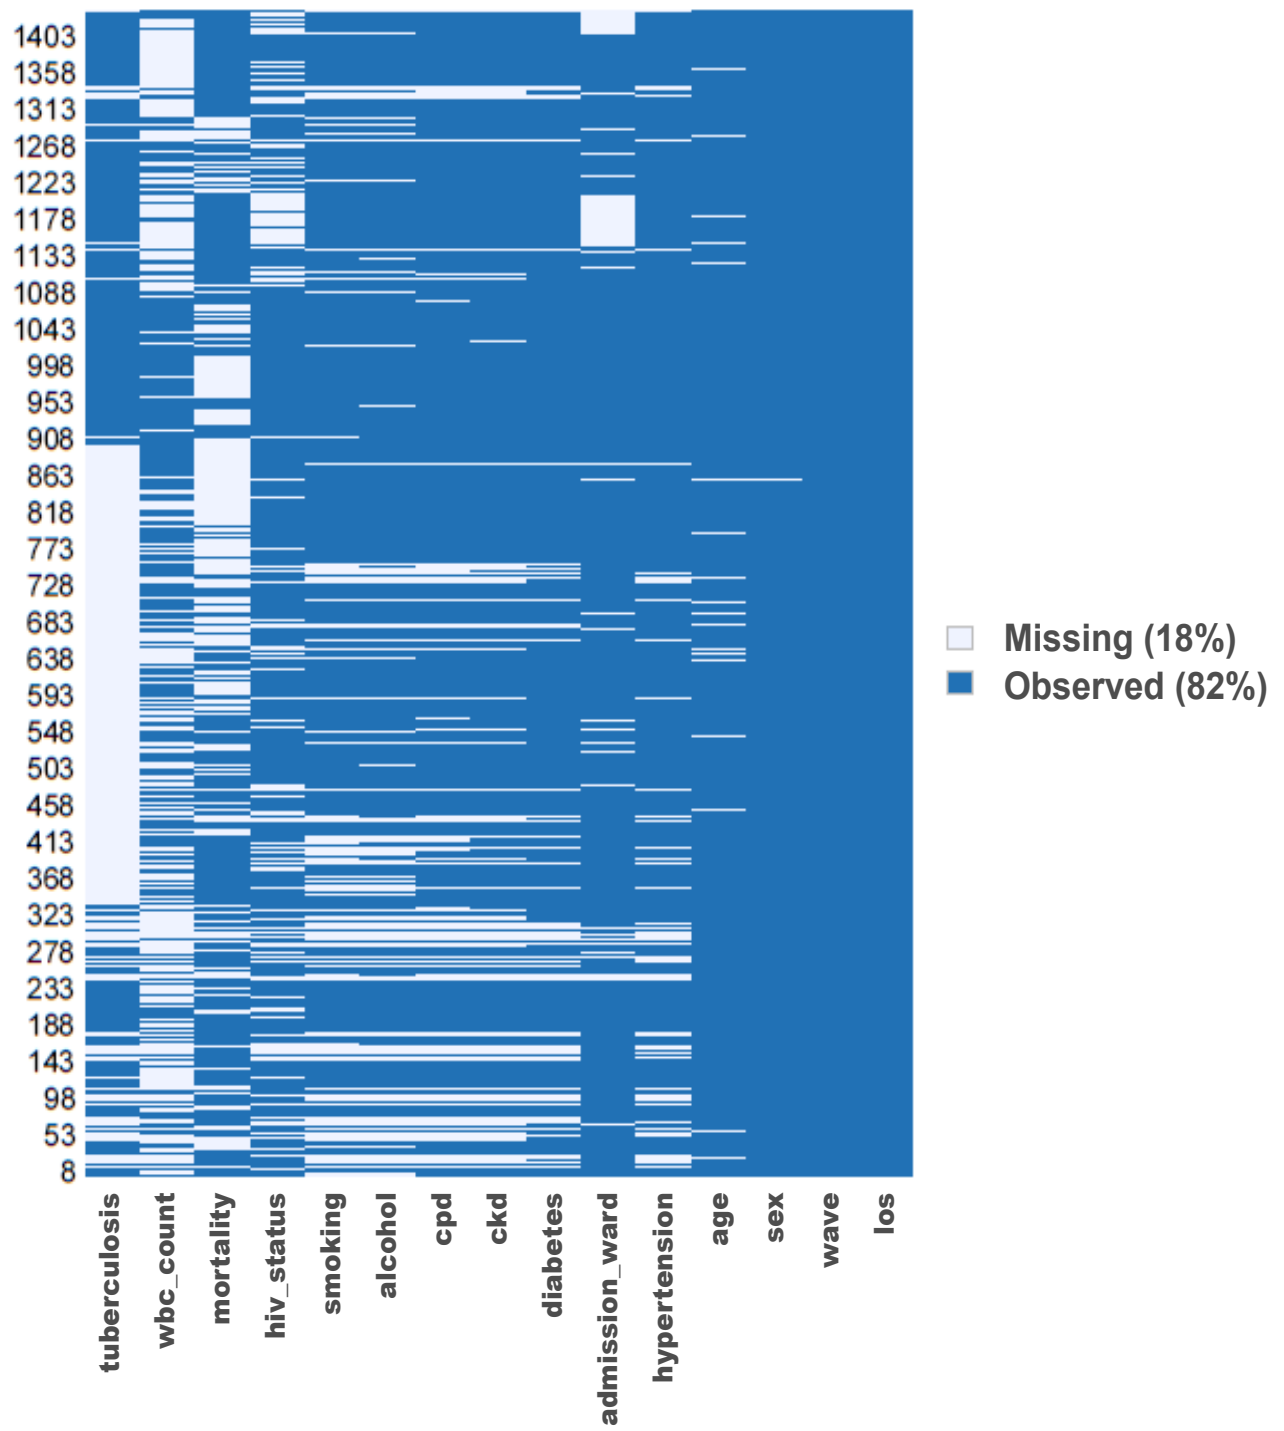

Supplement: f1 [file 8921220.f1.zip]
